# Supplementary material
Source: Springer Nature journal article supplement (https://www.springermedizin.de/resource/supplementary/12958_2011_955_MOESM2_ESM.pdf/9566450)

## BMP2

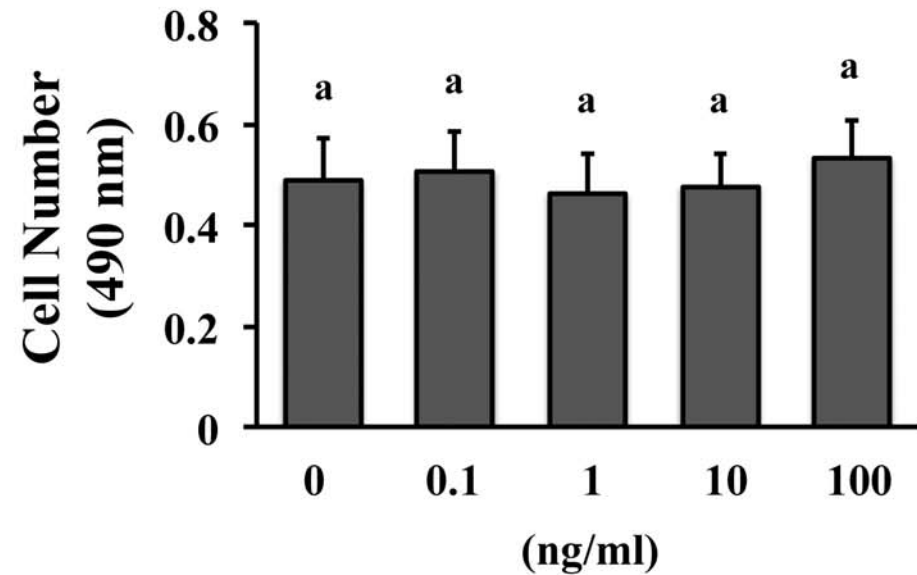

## BMP4

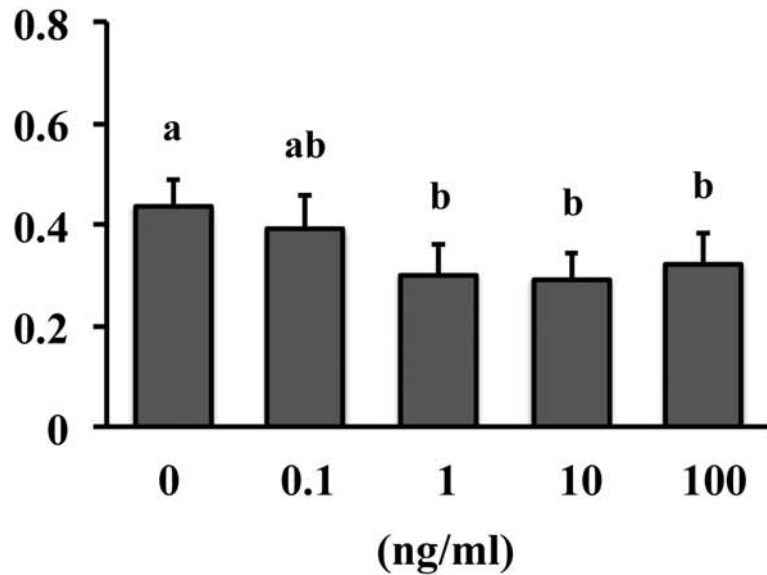

Supplement: MOESM2 [file 9566450]
